# Supplementary material for: Functional Diversity Accelerates the Decomposition of Litter Recalcitrant Carbon but Reduces the Decomposition of Labile Carbon in Subtropical Forests
Source: MDPI journal article supplement (doi:10.3390/f14112258), 2023-11-16
Supplement: s1 [file s1]

**Table S1.** General information on forest stand and soil of the sample plots

| Plots  | Tree species            | Mean DBH<br>(cm) | Mean height<br>(m) | Density<br>(stems/hm <sup>2</sup> ) | Soil total N<br>(g/kg) | Soil total P<br>(g/kg) | Soil total K<br>(g/kg) | pH   |
|--------|-------------------------|------------------|--------------------|-------------------------------------|------------------------|------------------------|------------------------|------|
| Plot 1 | <i>Pinus massoniana</i> | 24.5             | 17.5               | 1100                                | 0.33                   | 0.20                   | 46.63                  | 4.34 |
| Plot 2 | <i>Pinus massoniana</i> | 26.1             | 18                 | 1100                                | 0.24                   | 0.19                   | 48.26                  | 4.82 |
| Plot 3 | <i>Pinus massoniana</i> | 22.9             | 17.1               | 1100                                | 0.31                   | 0.20                   | 40.06                  | 4.69 |
| Plot 4 | <i>Pinus massoniana</i> | 23.7             | 17.6               | 1100                                | 0.39                   | 0.20                   | 42.34                  | 4.43 |

**Table S2.** Initial litter physical and chemical characteristics of seven tree species.

| Parameters | <i>Pinus<br/>massoniana</i> | <i>Liquidambar<br/>formosana</i> | <i>Schima<br/>superba</i> | <i>Quercus<br/>glauca</i> | <i>Quercus<br/>rubra</i> | <i>Castanopsis<br/>sclerophylla</i> | <i>Phoebe<br/>bournei</i> |
|------------|-----------------------------|----------------------------------|---------------------------|---------------------------|--------------------------|-------------------------------------|---------------------------|
| C (g/kg)   | 490.46                      | 433.24                           | 462.95                    | 466.70                    | 439.93                   | 460.74                              | 466.06                    |
| N (g/kg)   | 17.88                       | 16.11                            | 11.89                     | 10.95                     | 10.23                    | 10.50                               | 9.07                      |
| P (g/kg)   | 1.37                        | 0.67                             | 0.64                      | 0.50                      | 0.57                     | 0.64                                | 0.71                      |
| K (g/kg)   | 13.41                       | 26.03                            | 17.04                     | 15.42                     | 9.06                     | 14.27                               | 12.48                     |
| Cu (mg/kg) | 5.33                        | 5.31                             | 5.18                      | 3.91                      | 6.72                     | 5.38                                | 6.26                      |
| Mg (mg/kg) | 1519                        | 3057                             | 3746                      | 1046                      | 1832                     | 1995                                | 1342                      |
| Mn (mg/kg) | 1128                        | 2904                             | 7173                      | 1424                      | 3515                     | 1702                                | 647                       |
| Fe (mg/kg) | 270                         | 351                              | 342                       | 164                       | 683                      | 531                                 | 943                       |
| Zn (mg/kg) | 35                          | 27                               | 11                        | 16                        | 44                       | 34                                  | 32                        |
| Ca (mg/kg) | 16948                       | 22411                            | 20454                     | 18800                     | 15952                    | 19559                               | 15756                     |

|                          |        |        |        |        |        |        |        |
|--------------------------|--------|--------|--------|--------|--------|--------|--------|
| Cellulose (%DM)          | 15.93  | 14.25  | 17.40  | 13.00  | 10.56  | 20.02  | 11.64  |
| Lignin (%DM)             | 34.57  | 40.85  | 31.47  | 35.41  | 35.39  | 30.68  | 37.89  |
| SLA (cm <sup>2</sup> /g) | 86.20  | 145.47 | 109.95 | 86.04  | 177.05 | 78.78  | 84.61  |
| LT (mm)                  | 0.41   | 0.21   | 0.27   | 0.26   | 0.14   | 0.26   | 0.24   |
| W <sub>std</sub> (%DM)   | 26.85  | 68.35  | 42.24  | 14.55  | 62.18  | 18.94  | 19.55  |
| W <sub>max</sub> (%DM)   | 134.56 | 148.28 | 154.03 | 74.12  | 153.22 | 101.09 | 83.60  |
| TH (N/mm)                | 8.81   | 0.42   | 0.49   | 0.96   | 0.29   | 0.88   | 1.08   |
| TS (N/mm <sup>2</sup> )  | 0.76   | 0.19   | 0.17   | 0.43   | 0.17   | 0.58   | 0.43   |
| C/N                      | 27.43  | 26.90  | 38.94  | 42.62  | 43.00  | 43.88  | 51.38  |
| C/P                      | 358.86 | 644.27 | 720.07 | 935.15 | 772.06 | 720.75 | 652.23 |
| N/P                      | 13.08  | 23.95  | 18.49  | 21.94  | 17.95  | 16.43  | 12.69  |
| Lignin/N                 | 19.34  | 25.36  | 26.47  | 32.33  | 34.60  | 29.22  | 41.78  |
| Lignin/P                 | 116.57 | 211.97 | 270.68 | 260.53 | 185.37 | 313.20 | 162.86 |
| Soluble fraction (%DM)   | 23.66  | 30.94  | 19.92  | 19.23  | 16.04  | 19.71  | 18.77  |
| Cellulose fraction (%DM) | 36.20  | 34.76  | 44.73  | 43.02  | 45.54  | 54.58  | 41.41  |
| Lignin fraction (%DM)    | 40.13  | 34.30  | 35.34  | 37.75  | 38.42  | 25.71  | 39.82  |

C: carbon, N: nitrogen; P: phosphorus; K: potassium; copper (Cu), magnesium (Mg), manganese (Mn), iron (Fe), zinc (Zn), calcium (Ca); SLA: specific leaf area; LT: leaf thickness; TH: leaf toughness; TS: tensile strength (TS), W<sub>std</sub>: standard holding capacity; W<sub>max</sub>: saturated holding capacity.

**Table S3.** The relative mixing effects for mass and each carbon fraction of 32 litter mixtures. Mean RME and 90% confidence intervals are given in units of years<sup>-1</sup>. When a given mixture's confidence interval does not include 0, its RME is non-additive. Non-additive RMEs indicate either a lower (antagonistic) or a higher

(synergistic) rate of decomposition than what is expected based on single-species bags (RME = 0). Mixtures that conform to expectations are considered to have decomposed additively.

| Mixtures | Total mass |                 |              | Soluble |                  |              | Cellulose |                  |                 | Lignin |                  |              |
|----------|------------|-----------------|--------------|---------|------------------|--------------|-----------|------------------|-----------------|--------|------------------|--------------|
|          | RME        | RMEs+/-1SE      | Additivity?  | RME     | RMEs+/-1SE       | Additivity?  | RME       | RMEs+/-1SE       | Non-Additivity? | RME    | RMEs+/-1SE       | Additivity?  |
| M1       | 23.37      | (19.84, 26.89)  | Synergistic  | -34.91  | (-36.77, -33.06) | Antagonistic | 9.23      | (6.14, 12.33)    | Synergistic     | 86.60  | (81.22, 91.98)   | Synergistic  |
| M2       | 27.85      | (21.97, 33.73)  | Synergistic  | -46.24  | (-48.71, -43.76) | Antagonistic | 12.10     | (6.95, 17.26)    | Synergistic     | 126.68 | (116.96, 136.41) | Synergistic  |
| M3       | 6.38       | (5.70, 7.06)    | Synergistic  | -50.64  | (-50.96, -50.32) | Antagonistic | -15.66    | (-16.20, -15.12) | Antagonistic    | 129.46 | (127.97, 130.94) | Synergistic  |
| M4       | 57.37      | (46.35, 68.38)  | Synergistic  | -24.41  | (-29.71, -19.12) | Antagonistic | 12.46     | (4.57, 20.34)    | Synergistic     | 203.24 | (182.40, 224.08) | Synergistic  |
| M5       | -9.58      | (-15.77, -3.40) | Antagonistic | -19.09  | (-24.63, -13.55) | Antagonistic | -15.88    | (-21.67, -10.09) | Antagonistic    | -25.71 | (-30.70, -20.71) | Antagonistic |
| M6       | -4.35      | (-11.25, 2.55)  | Additive     | -36.51  | (-41.10, -31.92) | Antagonistic | -33.85    | (-38.64, -29.05) | Antagonistic    | 93.61  | (79.88, 107.34)  | Synergistic  |
| M7       | 11.64      | (4.22, 19.06)   | Synergistic  | -42.04  | (-45.90, -38.19) | Antagonistic | -17.36    | (-22.85, -11.87) | Antagonistic    | 104.68 | (91.47, 117.89)  | Synergistic  |
| M8       | 34.16      | (26.43, 41.89)  | Synergistic  | -19.49  | (-24.13, -14.85) | Antagonistic | 1.59      | (-4.26, 7.45)    | Additive        | 165.26 | (150.23, 180.29) | Synergistic  |
| M9       | 10.12      | (6.67, 13.57)   | Synergistic  | -36.12  | (-38.13, -34.12) | Antagonistic | -16.08    | (-18.71, -13.45) | Antagonistic    | 118.44 | (111.22, 125.67) | Synergistic  |
| M10      | 25.23      | (7.37, 43.10)   | Synergistic  | -37.83  | (-46.71, -28.95) | Antagonistic | -1.59     | (-15.65, 12.47)  | Additive        | 139.45 | (105.76, 173.15) | Synergistic  |
| M11      | -7.68      | (-13.81, -1.56) | Antagonistic | -38.16  | (-42.27, -34.05) | Antagonistic | -9.84     | (-15.83, -3.84)  | Antagonistic    | 29.93  | (21.32, 38.54)   | Synergistic  |
| M12      | 36.88      | (28.73, 45.03)  | Synergistic  | -32.01  | (-36.09, -27.92) | Antagonistic | 22.55     | (15.20, 29.90)   | Synergistic     | 106.54 | (94.46, 118.61)  | Synergistic  |
| M13      | 0.48       | (-6.62, 7.58)   | Additive     | -46.06  | (-49.88, -42.25) | Antagonistic | -7.80     | (-14.31, -1.28)  | Antagonistic    | 56.70  | (46.17, 67.23)   | Synergistic  |
| M14      | 14.42      | (10.06, 18.78)  | Synergistic  | -37.00  | (-39.40, -34.60) | Antagonistic | 9.63      | (5.45, 13.81)    | Synergistic     | 56.97  | (51.00, 62.93)   | Synergistic  |
| M15      | 3.45       | (-3.66, 10.56)  | Additive     | -69.56  | (-71.66, -67.46) | Antagonistic | -7.70     | (-14.04, -1.35)  | Antagonistic    | 168.89 | (150.63, 187.15) | Synergistic  |
| M16      | 2.33       | (-4.52, 9.17)   | Additive     | -47.83  | (-51.34, -44.33) | Antagonistic | -8.55     | (-14.69, -2.41)  | Antagonistic    | 52.43  | (42.62, 62.24)   | Synergistic  |
| M17      | 20.10      | (12.76, 27.44)  | Synergistic  | -35.29  | (-39.26, -31.32) | Antagonistic | 11.69     | (4.83, 18.54)    | Synergistic     | 60.54  | (50.79, 70.30)   | Synergistic  |
| M18      | 5.41       | (3.86, 6.95)    | Synergistic  | -38.30  | (-39.19, -37.40) | Antagonistic | -2.56     | (-3.98, -1.14)   | Antagonistic    | 51.41  | (49.22, 53.61)   | Synergistic  |
| M19      | 4.93       | (0.26, 9.60)    | Synergistic  | -50.91  | (-53.09, -48.72) | Antagonistic | 0.69      | (-3.78, 5.16)    | Additive        | 72.57  | (65.16, 79.97)   | Synergistic  |
| M20      | 31.38      | (23.18, 39.58)  | Synergistic  | -38.97  | (-42.77, -35.16) | Antagonistic | 12.33     | (5.31, 19.35)    | Synergistic     | 104.16 | (91.84, 116.48)  | Synergistic  |
| M21      | 14.23      | (4.80, 23.65)   | Synergistic  | -50.11  | (-54.24, -45.98) | Antagonistic | 3.25      | (-5.28, 11.78)   | Additive        | 97.38  | (81.91, 112.85)  | Synergistic  |
| M22      | -3.48      | (-7.01, 0.06)   | Additive     | -53.77  | (-55.47, -52.07) | Antagonistic | -6.64     | (-10.07, -3.21)  | Antagonistic    | 53.67  | (48.10, 59.23)   | Synergistic  |

|     |       |                 |              |        |                  |              |        |                  |              |        |                  |             |
|-----|-------|-----------------|--------------|--------|------------------|--------------|--------|------------------|--------------|--------|------------------|-------------|
| M23 | 16.58 | (7.61, 25.56)   | Synergistic  | -49.70 | (-53.58, -45.81) | Antagonistic | -9.91  | (-16.87, -2.94)  | Antagonistic | 158.14 | (138.61, 177.67) | Synergistic |
| M24 | 7.76  | (4.04, 11.48)   | Synergistic  | -40.00 | (-42.07, -37.92) | Antagonistic | -0.81  | (-4.25, 2.64)    | Additive     | 50.85  | (45.73, 55.97)   | Synergistic |
| M25 | 12.71 | (9.62, 15.81)   | Synergistic  | -50.36 | (-51.73, -48.99) | Antagonistic | -12.81 | (-15.23, -10.39) | Antagonistic | 141.28 | (134.80, 147.75) | Synergistic |
| M26 | -1.60 | (-8.55, 5.34)   | Additive     | -55.12 | (-58.29, -51.95) | Antagonistic | -1.95  | (-8.88, 4.98)    | Additive     | 75.90  | (63.72, 88.08)   | Synergistic |
| M27 | 6.99  | (3.38, 10.60)   | Synergistic  | -54.34 | (-55.88, -52.80) | Antagonistic | 7.63   | (4.00, 11.25)    | Synergistic  | 97.25  | (90.90, 103.60)  | Synergistic |
| M28 | 14.71 | (10.77, 18.65)  | Synergistic  | -43.34 | (-45.30, -41.39) | Antagonistic | -2.56  | (-5.92, 0.80)    | Additive     | 107.43 | (100.70, 114.15) | Synergistic |
| M29 | 19.67 | (10.41, 28.93)  | Synergistic  | -50.86 | (-54.67, -47.04) | Antagonistic | 21.82  | (12.36, 31.29)   | Synergistic  | 120.04 | (104.00, 136.09) | Synergistic |
| M30 | -7.77 | (-12.15, -3.39) | Antagonistic | -71.66 | (-73.01, -70.31) | Antagonistic | -11.98 | (-16.16, -7.79)  | Antagonistic | 113.48 | (103.40, 123.55) | Synergistic |
| M31 | 6.32  | (2.70, 9.94)    | Synergistic  | -37.71 | (-39.84, -35.57) | Antagonistic | 0.47   | (-2.97, 3.92)    | Additive     | 51.30  | (46.57, 56.02)   | Synergistic |
| M32 | 6.94  | (1.74, 12.13)   | Synergistic  | -38.34 | (-41.33, -35.34) | Antagonistic | -3.63  | (-8.31, 1.06)    | Additive     | 66.74  | (59.02, 74.46)   | Synergistic |

**Table S4.** Output of multiple linear regression between the variable (RMEs on total litter, soluble, cellulose, and lignin) (*k* constant) and the five first axes of the PCA of litter functional dissimilarity.

| Relative mixing effects (RMEs)  | Litter functional diversity | Estimate     | Std. Error  | <i>t</i> value | <i>P</i> value  |     |
|---------------------------------|-----------------------------|--------------|-------------|----------------|-----------------|-----|
| Total mass ( <i>k</i> constant) | Intercept                   | 11.94        | 1.78        | 6.71           | <0.001          | *** |
|                                 | PC1                         | -1.62        | 0.56        | -2.87          | <0.01           | **  |
|                                 | PC2                         | -1.86        | 0.72        | -2.57          | <0.05           | *   |
|                                 | <b>PC3</b>                  | <b>3.04</b>  | <b>0.91</b> | <b>3.36</b>    | <b>&lt;0.01</b> | **  |
|                                 | PC4                         | 2.58         | 0.88        | 2.93           | <0.01           | **  |
|                                 | PC5                         | -4.92        | 1.32        | -3.73          | <0.001          | *** |
|                                 | Marginal $r^2 = 40.10\%$    |              |             |                |                 |     |
| Soluble ( <i>k</i> constant)    | Intercept                   | -42.98       | 1.87        | -22.99         | <0.001          | *** |
|                                 | PC1                         | -0.67        | 0.51        | -1.29          | 0.201           |     |
|                                 | <b>PC2</b>                  | <b>-1.75</b> | <b>0.63</b> | <b>-2.79</b>   | <b>&lt;0.01</b> | **  |
|                                 | PC3                         | 0.34         | 0.87        | 0.39           | 0.697           |     |

|                        |                          |              |             |              |                 |           |
|------------------------|--------------------------|--------------|-------------|--------------|-----------------|-----------|
|                        | PC4                      | 1.48         | 0.75        | 1.97         | 0.054           |           |
|                        | PC5                      | 0.44         | 1.29        | 0.34         | 0.738           |           |
|                        | Marginal $r^2 = 17.87\%$ |              |             |              |                 |           |
| Cellulose (k constant) | Intercept                | -2.01        | 1.96        | -1.02        | 0.314           |           |
|                        | PC1                      | -0.33        | 0.59        | -0.56        | 0.58            |           |
|                        | PC2                      | -0.19        | 0.75        | -0.26        | 0.799           |           |
|                        | PC3                      | 0.82         | 0.96        | 0.85         | 0.399           |           |
|                        | PC4                      | 1.67         | 0.89        | 1.86         | 0.067           |           |
|                        | <b>PC5</b>               | <b>-4.52</b> | <b>1.42</b> | <b>-3.18</b> | <b>&lt;0.01</b> | <b>**</b> |
|                        | Marginal $r^2 = 23.27\%$ |              |             |              |                 |           |
| Lignin (k constant)    | Intercept                | 97.63        | 7.27        | 13.02        | <0.001          | ***       |
|                        | PC1                      | -2.99        | 1.93        | -1.56        | 0.126           |           |
|                        | PC2                      | -1.66        | 2.34        | -0.71        | 0.48            |           |
|                        | <b>PC3</b>               | <b>7.69</b>  | <b>2.81</b> | <b>2.74</b>  | <b>&lt;0.01</b> | <b>**</b> |
|                        | PC4                      | 8.83         | 3.29        | 2.68         | <0.05           | *         |
|                        | PC5                      | -10.05       | 4.93        | -2.04        | <0.05           | *         |
|                        | Marginal $r^2 = 27.97\%$ |              |             |              |                 |           |
